# Supplementary material
Source: publisher site journal article supplement (https://www.dovepress.com/article/234800)
Supplement: Supplementary file 1 [file get_supplementary_file.php]

## Supplementary files

Oostendorp RAB, Elvers JWH, van Trijffel E, Rutten GM, Scholten–Peeters GGM, Heijmans M, Hendriks E, Mikolajewska E, De Kooning M, Laekeman M, Nijs J, Roussel N, Samwel H. Relationships Between Context, Process, and Outcome Indicators to Assess Quality of Physiotherapy Care in Patients with Whiplash-Associated Disorders: Applying Donabedian’s Model of Care. Patient Preference and Adherence. In Press 2020.

*Adapted from Oostendorp RA, Elvers H, van Trijffel E, et al. Has the quality of physiotherapy care in patients with Whiplash-associated disorders (WAD) improved over time? A retrospective study using routinely collected data and quality indicators. Patient Prefer Adherence. 2018;12:2291–2308. Copyright © 2018 Oostendorp et al. This work is published and licensed by Dove Medical Press Limited The full terms of this license are available at: <https://www.dovepress.com/terms.php> and incorporate the Creative Commons Attribution – Non Commercial (unported, v3.0) License (<http://creativecommons.org/licenses/by-nc/3.0/>). By accessing the work you hereby accept the Terms. Non-commercial uses of the work are permitted without any further permission from Dove Medical Press Limited, provided the work is properly attributed.*

**Supplementary file 1.** Overview of variables of context (n=9), process (n=9), outcome (n=7) and structure (n=2) indicators for physiotherapy in patients with Whiplash-Associated Disorders (WAD).

**Supplementary file 2.** Variables per context indicator in patients with Whiplash-Associated Disorders (WAD).

**Supplementary file 3.** Variables per process indicator in patients with Whiplash-Associated Disorders (WAD).

**Supplementary file 4.**

Variables per outcome indicator in patients with Whiplash-Associated Disorders (WAD).

**Supplementary file 1.**

**Overview of variables of context (n=9), process (n=9), outcome (n=7) and structure (n=2) indicators for physiotherapy in patients with Whiplash-Associated Disorders (WAD)**

| I Context indicators                                    |                                                                                                                          |
|---------------------------------------------------------|--------------------------------------------------------------------------------------------------------------------------|
| Indicator 1: Patient's information                      |                                                                                                                          |
| Year of referral                                        | Interval: 1996 - 2011                                                                                                    |
| Referral                                                | Interval: number<br>Interval: number<br>Interval: number                                                                 |
| - General practitioner                                  |                                                                                                                          |
| - Medical specialist                                    |                                                                                                                          |
| - Self-referral (since 2006)                            |                                                                                                                          |
| Indicator 2: Patient's request for help                 |                                                                                                                          |
| Patient's request for care                              | Nominal: reducing pain; explaining consequences of whiplash; improving function; increasing activity and participation   |
| Indicator 3: Patient's sociodemographic characteristics |                                                                                                                          |
| Age                                                     | Interval: age in years at start                                                                                          |
| Gender                                                  | Nominal: female; male                                                                                                    |
| Education                                               | Nominal: low; advanced; high                                                                                             |
| Employment status                                       | Nominal: not employed; employed; retired                                                                                 |
| Indicator 4: Accident related information               |                                                                                                                          |
| Direction of impact                                     | Dichotomous: back; other                                                                                                 |
| Anticipated collision                                   | Dichotomous: no; yes                                                                                                     |
| Type of trauma                                          | Ordinal: neck trauma without direct head trauma; neck trauma with direct head trauma; other type of neck trauma; unknown |
| Time of onset of whiplash-related complaints            | Ordinal: immediately; ≤ 2 days; 3-7 days; > 1 week                                                                       |
| Indicator 5: Pre-existent functioning                   |                                                                                                                          |
| Pre-existent activity limitations                       | Dichotomous: no; yes                                                                                                     |
| Pre-existent participation problems                     | Dichotomous: no; yes                                                                                                     |
| Pre-existent job-related problems                       | Dichotomous: no; yes                                                                                                     |
| Indicator 6: Pre-existent health status before injury   |                                                                                                                          |

|                                                                             |                                                                                                                                                                                                                                                                                              |
|-----------------------------------------------------------------------------|----------------------------------------------------------------------------------------------------------------------------------------------------------------------------------------------------------------------------------------------------------------------------------------------|
| Relevant medication use                                                     | Dichotomous: no; yes                                                                                                                                                                                                                                                                         |
| Previous history of neck injury                                             | Dichotomous: no; yes                                                                                                                                                                                                                                                                         |
| Previous neck pain and stiffness                                            | Dichotomous: no; yes                                                                                                                                                                                                                                                                         |
| Previous pain else                                                          | Dichotomous: no; yes                                                                                                                                                                                                                                                                         |
| <b>Indicator 7: Previous diagnostics and treatment</b>                      |                                                                                                                                                                                                                                                                                              |
| Medical imaging neck diagnostics                                            | Dichotomous: no; yes                                                                                                                                                                                                                                                                         |
| Cervical soft collar after trauma                                           | Dichotomous: no; yes<br>Interval: if yes, number of weeks                                                                                                                                                                                                                                    |
| Pain medication                                                             | Dichotomous: no; yes                                                                                                                                                                                                                                                                         |
| Modalities of (manual) physiotherapy                                        | Code of Classification of Physiotherapy Modalities <sup>#</sup>                                                                                                                                                                                                                              |
| Recovery after previous treatment                                           | Ordinal: fully recovered; partially recovered; stabilization; deterioration; inestimable                                                                                                                                                                                                     |
| <b>Indicator 8: Current health status</b>                                   |                                                                                                                                                                                                                                                                                              |
| Activity limitations                                                        | Dichotomous: no; yes                                                                                                                                                                                                                                                                         |
| Participation problems                                                      | Dichotomous: no; yes                                                                                                                                                                                                                                                                         |
| Job-related problems                                                        | Dichotomous: no; yes                                                                                                                                                                                                                                                                         |
| Pain medication                                                             | Dichotomous: no; yes                                                                                                                                                                                                                                                                         |
| Current type and number of complaints                                       | Ordinal: ≤3 : neck pain, stiffness, decreased range of neck motion; 4-6: + dizziness, headache and tinnitus; 7-9:+ cognitive impairments; > 9: + rest                                                                                                                                        |
| Type of signs and symptoms                                                  | Ordinal: type 1: neck symptoms (pain, stiffness and tenderness) and no physical sign; type 2: + decreased range of motion; type 3: + neurological signs                                                                                                                                      |
| <b>Indicator 9: Recovery since accident and previous prognostic factors</b> |                                                                                                                                                                                                                                                                                              |
| Estimation of previous coping                                               | Ordinal: active; inestimable; passive                                                                                                                                                                                                                                                        |
| Estimation of previous fear avoidance                                       | Ordinal: no; inestimable; yes                                                                                                                                                                                                                                                                |
| Classification Whiplash-Associated Disorders (WAD)                          | Ordinal:<br>WAD 0: no neck symptoms, no physical sign(s);<br>WAD 1: neck pain, stiffness or tenderness only, no physical sign(s);<br>WAD 2: neck symptoms and musculoskeletal sign(s);<br>WAD 3: neck symptoms and neurological sign(s);<br>WAD 4: neck symptoms and fracture or dislocation |
| Time phase since accident                                                   | Ordinal: phase 1: < 7 days; phase 2: 1-3 weeks; phase 3a (normal recovery) and phase 3b (delayed recovery): 4-6 weeks; phase 4a (normal recovery) and phase 4b (delayed recovery): 7-12 weeks; phase 5 (chronic): 3-6 months; phase 6 (chronic): > 6 months                                  |
| Recovery rate since accident                                                | Nominal: normal; inestimable; delayed                                                                                                                                                                                                                                                        |

|                                                                                                                                                                                                                                                                                                                                                   |                                                                                                                                                                                                                                                                                                                                                                                                                                       |
|---------------------------------------------------------------------------------------------------------------------------------------------------------------------------------------------------------------------------------------------------------------------------------------------------------------------------------------------------|---------------------------------------------------------------------------------------------------------------------------------------------------------------------------------------------------------------------------------------------------------------------------------------------------------------------------------------------------------------------------------------------------------------------------------------|
| Determination of health profile                                                                                                                                                                                                                                                                                                                   | Ordinal:<br>Profile A: normal recovery, low intensity of pain, decreasing pain, increasing activities; active coping, no fear avoidance<br>Profile B: inestimable recovery, middle intensity of pain, persistent pain, persistent activity limitations; inestimable coping, inestimable fear avoidance<br>Profile C: delayed recovery, high intensity of pain, increasing pain, decreasing activities; passive coping, fear avoidance |
| Added prognostic factors related to recovery:<br>- Inventory of prognostic non-organic modified Waddell's signs: (1) superficial tenderness, (2) non-anatomical tenderness, (3) pain simulation test, (4) cervical range of motion, (5) regional disturbance, (6) overreaction (since 2001)<br>- Estimation of central sensitization (since 2009) | Dichotomous: ≤ 3; >3<br><br>Nominal: no; inestimable; yes                                                                                                                                                                                                                                                                                                                                                                             |
| <b>II. Process indicators</b>                                                                                                                                                                                                                                                                                                                     |                                                                                                                                                                                                                                                                                                                                                                                                                                       |
| Indicator 10: Objectives of examination                                                                                                                                                                                                                                                                                                           |                                                                                                                                                                                                                                                                                                                                                                                                                                       |
| Objectives of musculoskeletal examination                                                                                                                                                                                                                                                                                                         | Dichotomous: no; yes                                                                                                                                                                                                                                                                                                                                                                                                                  |
| Objectives of neurological examination                                                                                                                                                                                                                                                                                                            | Dichotomous: no; yes                                                                                                                                                                                                                                                                                                                                                                                                                  |
| Objectives of oto-neurological examination (since 2000)                                                                                                                                                                                                                                                                                           | Dichotomous: no; yes                                                                                                                                                                                                                                                                                                                                                                                                                  |
| Objectives of psychological examination (since 2000)                                                                                                                                                                                                                                                                                              | Dichotomous: no; yes                                                                                                                                                                                                                                                                                                                                                                                                                  |
| Indicator 11: Musculoskeletal examination                                                                                                                                                                                                                                                                                                         |                                                                                                                                                                                                                                                                                                                                                                                                                                       |
| Observation of posture                                                                                                                                                                                                                                                                                                                            | Dichotomous: no; yes                                                                                                                                                                                                                                                                                                                                                                                                                  |
| Active range of motion                                                                                                                                                                                                                                                                                                                            | Dichotomous: no; yes                                                                                                                                                                                                                                                                                                                                                                                                                  |
| Passive range of motion                                                                                                                                                                                                                                                                                                                           | Dichotomous: no; yes                                                                                                                                                                                                                                                                                                                                                                                                                  |
| Palpation                                                                                                                                                                                                                                                                                                                                         | Dichotomous: no; yes                                                                                                                                                                                                                                                                                                                                                                                                                  |
| Indicator 12: Neurological examination                                                                                                                                                                                                                                                                                                            |                                                                                                                                                                                                                                                                                                                                                                                                                                       |
| Sensory functions and pain                                                                                                                                                                                                                                                                                                                        | Dichotomous: no; yes                                                                                                                                                                                                                                                                                                                                                                                                                  |
| Muscle functions                                                                                                                                                                                                                                                                                                                                  | Dichotomous: no; yes                                                                                                                                                                                                                                                                                                                                                                                                                  |
| Reflexes                                                                                                                                                                                                                                                                                                                                          | Dichotomous: no; yes                                                                                                                                                                                                                                                                                                                                                                                                                  |
| Coordination                                                                                                                                                                                                                                                                                                                                      | Dichotomous: no; yes                                                                                                                                                                                                                                                                                                                                                                                                                  |
| Indicator 13: Oto-neurological examination (since 2000)                                                                                                                                                                                                                                                                                           |                                                                                                                                                                                                                                                                                                                                                                                                                                       |
| Standing and gait testing                                                                                                                                                                                                                                                                                                                         | Dichotomous: no; yes                                                                                                                                                                                                                                                                                                                                                                                                                  |

|                                                                                                                                                                                                                     |                                                                                                                                                                                              |
|---------------------------------------------------------------------------------------------------------------------------------------------------------------------------------------------------------------------|----------------------------------------------------------------------------------------------------------------------------------------------------------------------------------------------|
| Dizziness test                                                                                                                                                                                                      | Dichotomous: no; yes                                                                                                                                                                         |
| Positional test                                                                                                                                                                                                     | Dichotomous: no; yes                                                                                                                                                                         |
| Eye movement test                                                                                                                                                                                                   | Dichotomous: no; yes                                                                                                                                                                         |
| <b>Indicator 14: Psychological examination</b>                                                                                                                                                                      |                                                                                                                                                                                              |
| Observation of pain behavior (since 2000)                                                                                                                                                                           | Dichotomous: no; inestimable; yes                                                                                                                                                            |
| Pain Coping Inventory (PCI) (since 2002)                                                                                                                                                                            | Score: 1: hardly ever; 4:very often<br>PCI-Active: interval: range score 12-48 (cutoff point $\geq 24$ )<br>PCI-Passive: Interval: range score 21-84 (cutoff point $\geq 42$ )               |
| Fear Avoidance Beliefs Questionnaire-Dutch Version (FABQ-DV) (since 2002):                                                                                                                                          | Score: 0 (strongly disagree); 6 (strongly agree)<br>FABQ-DV-Activities: interval: range score 0-24 (cutoff point $> 15$ )<br>FABQ-DV-work: interval: range score 0-42 (cutoff point $> 34$ ) |
| <b>Indicator 15: Conclusion diagnostic process</b>                                                                                                                                                                  |                                                                                                                                                                                              |
| Contact with general practitioner (GP) about physiotherapy indication                                                                                                                                               | Dichotomous: no; yes                                                                                                                                                                         |
| Indication physiotherapy                                                                                                                                                                                            | Nominal: no; doubtful; yes                                                                                                                                                                   |
| <b>Indicator 16: Treatment goals per phase after whiplash-related accident</b>                                                                                                                                      |                                                                                                                                                                                              |
| Treatment goals                                                                                                                                                                                                     |                                                                                                                                                                                              |
| Phase 1: <7 days (number): reducing pain; providing information and explaining the functioning consequences and underlying pain mechanisms                                                                          | Dichotomous: no; yes                                                                                                                                                                         |
| Phase2: 1-3 weeks (number): see Phase 1 + improving functions                                                                                                                                                       | Dichotomous: no; yes                                                                                                                                                                         |
| Phase 3a (normal recovery): 4 – 6 weeks (number): see Phase 2 + increasing activities and participation                                                                                                             | Dichotomous: no; yes                                                                                                                                                                         |
| Phase 3b (delayed recovery): 4 – 6 weeks (number): explaining underlying pain mechanisms, improving active coping, decreasing fear avoidance, increasing physical capacity, increasing activities and participation | Dichotomous: no; yes                                                                                                                                                                         |
| Phase 4a (normal recovery): 7 – 12 weeks (number): see Phase 3a + minimizing delay in work participation                                                                                                            | Dichotomous: no; yes                                                                                                                                                                         |
| Phase 4b (delayed recovery): 7 – 12 weeks (number): see Phase 3b                                                                                                                                                    | Dichotomous: no; yes                                                                                                                                                                         |

|                                                                                                                                   |                                                                       |
|-----------------------------------------------------------------------------------------------------------------------------------|-----------------------------------------------------------------------|
| Phase 5 (chronic): 3 – 6 months (number): see Phase 3b                                                                            | Dichotomous: no; yes                                                  |
| Phase 6 (chronic): > 6 months (number): see Phase 3b                                                                              | Dichotomous: no; yes                                                  |
| Treatment plan in agreement with patient                                                                                          | Dichotomous: no; yes                                                  |
| Estimation of treatment period                                                                                                    | Ordinal: not estimable; < 1 month; 2-3 months; 4-6 months; > 6 months |
| Estimation number of treatment sessions                                                                                           | Ordinal: not estimable; < 5 sessions; 5-10; 11-15; 16-20; > 20        |
| <b>Indicator 17: Treatment (Manual) physiotherapy modalities<sup>#</sup> per phase in agreement with treatment goals</b>          |                                                                       |
| Physiotherapy modalities with best available evidence in agreement with treatment goals per phase since whiplash-related accident |                                                                       |
| Phase 1 (number): Education, coaching, active exercise therapy                                                                    | Dichotomous: no; yes                                                  |
| Phase 2 (number): See Phase 1 + cervical soft collar (< 1 week), massage therapy (< 2 weeks)                                      | Dichotomous: no; yes                                                  |
| Phase 3a (number): See Phase 1 + active physical loading exercise therapy                                                         | Dichotomous: no; yes                                                  |
| Phase 3b (number): Pain education, coaching, active exercise therapy based on cognitive and physical principles                   | Dichotomous: no; yes                                                  |
| Phase 4a (number): See Phase 3a + active exercise therapy (graded activity)                                                       | Dichotomous: no; yes                                                  |
| Phase 4b (number): See Phase 3b + active exercise therapy (graded exposure)                                                       | Dichotomous: no; yes                                                  |
| Phase 5 (number): See Phase 4b                                                                                                    | Dichotomous: no; yes                                                  |
| Phase 6 (number): See Phase 5                                                                                                     | Dichotomous: no; yes                                                  |
| <b>Indicator 18: Side effects</b>                                                                                                 |                                                                       |
| Check for treatment side or adverse effects                                                                                       | Dichotomous: no; yes                                                  |
| <b>III. Outcome indicators</b>                                                                                                    |                                                                       |
| <b>Indicator 19: Intermediate evaluation</b>                                                                                      |                                                                       |
| Frequency                                                                                                                         | Nominal: no; weekly; monthly                                          |
| Type of evaluation                                                                                                                | Dichotomous: by asking; by asking + treatment goals;                  |

|                                                                         |                                                                                                                                                      |
|-------------------------------------------------------------------------|------------------------------------------------------------------------------------------------------------------------------------------------------|
| If necessary, adjustment of treatment goals and treatment modalities    | Dichotomous: no; yes                                                                                                                                 |
| Contact physician if insufficient treatment result                      | Dichotomous: no; yes                                                                                                                                 |
| <b>Indicator 20: Subjective final evaluation</b>                        |                                                                                                                                                      |
| Subjective evaluation                                                   | Dichotomous: by asking; by asking + treatment goals                                                                                                  |
| Return to work participation                                            | Ordinal: no; not employed; employed with adjustments; employed without adjustments; retired                                                          |
| <b>Indicator 21: Objective final evaluation</b>                         |                                                                                                                                                      |
| Pain intensity (Visual Analogue Scale [VAS]) (since 2002)               | Interval: range score 0-100 ( $\leq 30$ : functionally recovered); pre- and posttreatment                                                            |
| Functioning (Neck Disability Index [NDI]) (since 2002)                  | Interval: range score 0-50 ( $\leq 14$ : functionally recovered); pre- and posttreatment                                                             |
| <b>Indicator 22: Global perceived effect</b>                            |                                                                                                                                                      |
| Evaluation by Global Perceived Effect (GPE) (since 2002)                | Ordinal: range score 1 – 6: 1: complete improved; 2: much improved; 3: slightly improved; 4: no change; 5: slightly worse; 6: much worse (than ever) |
| <b>Indicator 23: Treatment duration and number of sessions</b>          |                                                                                                                                                      |
| Duration of treatment period                                            | Ordinal: < 1 month; 2-3 months; 4-6 months; > 6 months                                                                                               |
| Number of treatment sessions                                            | Ordinal: < 5 sessions; 5-10 session; 11-15 sessions; 16-20 sessions; >20 sessions                                                                    |
| <b>Indicator 24: Discharge</b>                                          |                                                                                                                                                      |
| Reason for discharge                                                    | Ordinal: maximal result; optimal result; minimal result (slightly improved or deteriorated); no result                                               |
| Written report                                                          | Dichotomous: no; yes                                                                                                                                 |
| <b>Indicator 25: Aftercare</b>                                          |                                                                                                                                                      |
| Arrangement of aftercare (since 2003)                                   | Dichotomous: no; yes                                                                                                                                 |
| <b>IV. Structure indicators</b>                                         |                                                                                                                                                      |
| <b>Indicator 26: Physiotherapy practice</b>                             |                                                                                                                                                      |
| Number of physiotherapy practice                                        | Interval: number                                                                                                                                     |
| Number of participating physiotherapists                                | Interval: number                                                                                                                                     |
| <b>Indicator 27: Physiotherapist's sociodemographic characteristics</b> |                                                                                                                                                      |
| Clinical experience                                                     | Interval: years at start                                                                                                                             |
| Specialized experience                                                  | Interval: years at start                                                                                                                             |
| Age                                                                     | Interval: age in years at start                                                                                                                      |
| Gender                                                                  | Nominal: female; male                                                                                                                                |

Legend:

# Classification of Physiotherapy Modalities (Heerkens Y, Heuvel J van den, Klaveren T van, Ravensberg D van, Heuvel C van den, Meeteren N van. Classification Allied Health Care – version Physiotherapy. Amersfoort: Nederlands Paramedisch Instituut; 1995):

- 1. History taking
- 2. Inspection and observation
- 3. Palpation
- 4. Active exercise therapy
- 5. Passive exercise therapy (including manual therapy)
- 6. Massage therapy
- 7. Modalities of physical therapy ( i.e. low- and high frequency electrotherapy)
- 8. Coaching
- 9. Education (including pain education)



**Supplementary file 2.**

**Variables per context indicator in patients with Whiplash-Associated Disorders (WAD)**

| Description of context indicator                               | Total<br>N=810<br>n (%) / mean (SD) |
|----------------------------------------------------------------|-------------------------------------|
| <b>Indicator 1: Patient's information</b>                      |                                     |
| Year of referral 1996 – 2011                                   | 810 (100)                           |
| Referral                                                       |                                     |
| - General physician                                            | 549 (67.8)                          |
| - Medical specialist                                           | 164 (20.2)                          |
| - Self-referral (since 2005)                                   | 97 (12.0)                           |
| <b>Indicator 2: Request for care</b>                           |                                     |
| Patient's request for care                                     |                                     |
| - Reducing pain                                                | 759 (93.7)                          |
| - + Explaining consequences of whiplash                        | 12 (1.5)                            |
| - + Improving functions                                        | 38 (4.7)                            |
| - + Increasing activities and participation                    | 1 (0.1)                             |
| <b>Indicator 3: Patient's sociodemographic characteristics</b> |                                     |
| Age (year) (mean; SD)                                          | 43.5 (12.5)                         |
| Gender (female)                                                | 586 (72.3)                          |
| Educational level                                              |                                     |
| - Low                                                          | 450 (55.6)                          |
| - Intermediate                                                 | 237 (29.3)                          |
| - High                                                         | 123 (15.2)                          |
| Employment status                                              |                                     |
| - Not employed                                                 | 214 (26.4)                          |
| - Employed                                                     | 510 (62.0)                          |
| - Retired                                                      | 86 (10.6)                           |
| <b>Indicator 4: Accident-related information</b>               |                                     |
| Direction of impact (back)                                     | 513 (63.3)                          |

|                                                              |            |
|--------------------------------------------------------------|------------|
| Anticipated collision (no)                                   | 583 (72.0) |
| Type of trauma                                               |            |
| - Neck trauma without head trauma                            | 572 (70.6) |
| - Neck trauma with head trauma                               | 198 (24.4) |
| - Other trauma                                               | 40 (4.9)   |
| - Unknown                                                    | -          |
| Time of onset whiplash-related complaints                    |            |
| - Immediately                                                | 145 (17.9) |
| - ≤ 2 days                                                   | 556 (68.9) |
| - 3-7 days                                                   | 109 (13.5) |
| - > 1 week                                                   | -          |
| <b>Indicator 5: Pre-existent functioning</b>                 |            |
| Pre-existent functioning problems                            |            |
| - Pre-existent activity limitation (yes)                     | 125 (15.4) |
| - Pre-existent participation problems (yes)                  | 109 (13.5) |
| - Pre-existent Job-related problems (yes)                    | 93 (11.5)  |
| <b>Indicator 6: Pre-existent health status before injury</b> |            |
| Relevant medication use (yes)                                | 107 (13.2) |
| Previous history of neck injury (yes)                        | 81 (10.0)  |
| Previous neck pain and stiffness (yes)                       | 144 (17.8) |
| Pain else (yes)                                              | 150 (15.8) |
| <b>Indicator 7: Previous diagnostics and treatment</b>       |            |
| Medical imaging neck diagnostics (yes)                       | 178 (22.0) |
| Cervical soft collar (yes)                                   | 515 (63.6) |
| - Weeks (mean; SD)                                           | 3.9 (2.0)  |
| Pain medication (yes)                                        | 369 (45.6) |
| (Manual) physiotherapy (yes)                                 | 332 (40.0) |
| Recovery after previous treatment                            |            |
| - Fully recovered                                            | -          |
| - Partially recovered                                        | 43 (5.3)   |
| - Stabilization                                              | 263 (32.5) |
| - Deterioration                                              | 314 (38.8) |

|                                                                             |            |
|-----------------------------------------------------------------------------|------------|
| - Inestimable                                                               | 190 (23.5) |
| <b>Indicator 8: Current health status</b>                                   |            |
| Current functioning problems                                                |            |
| - Activity limitation (yes)                                                 | 688 (84.9) |
| - Participation problems (yes)                                              | 712 (87.9) |
| - Job-related problems (yes)                                                | 312 (38.5) |
| Current pain medication (yes)                                               | 242 (29.9) |
| Current type and number of complaints                                       |            |
| - ≤ 3: neck pain, stiffness, decreased ROM <sup>#</sup>                     | 6 (0.7)    |
| - 4-6: + dizziness, headache and tinnitus                                   | 374 (46.2) |
| - 7-9: + cognitive impairments                                              | 424 (52.3) |
| - > 9: + rest                                                               | 6 (0.7)    |
| Current type of signs and symptoms                                          |            |
| - Neck symptoms (pain, stiffness and tenderness)                            | 114 (14.1) |
| - Neck symptoms + decreased ROM <sup>#</sup>                                | 559 (69.0) |
| - Neck symptoms + decreased ROM <sup>#</sup> + neurological signs           | 137 (16.9) |
| <b>Indicator 9: Recovery since accident and previous prognostic factors</b> |            |
| <i>Estimation of coping</i>                                                 |            |
| - Active                                                                    | 329 (40.7) |
| - Inestimable                                                               | 38 (3.7)   |
| - Passive                                                                   | 443 (54.7) |
| <i>Estimation fear avoidance</i>                                            |            |
| - No                                                                        | 146 (18.2) |
| - Inestimable                                                               | 197 (24.3) |
| - Yes                                                                       | 467 (57.7) |

|                                           |            |
|-------------------------------------------|------------|
| <i>Classification WAD##</i>               |            |
| - WAD 0                                   | -          |
| - WAD 1                                   | 123 (15.2) |
| - WAD 2                                   | 555 (68.5) |
| - WAD 3                                   | 132 (16.3) |
| - WAD 4                                   | -          |
| <i>Time phase since accident</i>          |            |
| - > 7 days                                | 19 (2.3)   |
| - 1 – 3 weeks                             | 140 (17.3) |
| - 4 – 6 weeks                             | 192 (23.7) |
| - 7 -12 weeks                             | 183 (22.6) |
| - 3 – 6 months                            | 155 (19.1) |
| - > 6 months                              | 121 (14.9) |
| <i>Recovery rate since accident</i>       |            |
| - Normal                                  | -          |
| - Inestimable                             | 369 (45.6) |
| - Delayed                                 | 441 (54.4) |
| <i>Determination of health profile###</i> |            |
| - Profile A                               | 184 (22.7) |
| - Profile B                               | 350 (43.2) |
| - Profile C                               | 276 (34.1) |

Legend:

SD = standard deviation

# ROM: Range of Motion

## Classification WAD: Whiplash-Associated Disorders:

- WAD 0: no neck symptoms, no physical sign(s);
- WAD 1: neck pain, stiffness or tenderness only, no physical sign(s);
- WAD 2: neck symptoms and musculoskeletal sign(s);
- WAD 3: neck symptoms and neurological sign(s);
- WAD 4: neck symptoms and fracture or dislocation;

### Health Profile:

- Profile A: normal recovery, low intensity of pain, decreasing pain, increasing activities, active coping, no fear avoidance
- Profile B: inestimable recovery, middle intensity of pain, persistent pain, persistent activity limitations, inestimable coping, inestimable fear avoidance
- Profile C: delayed recovery, high intensity of pain, increasing pain, decreasing activities, passive coping, fear avoidance

### Supplementary file 3.

#### Variables per process indicator in patients with Whiplash-Associated Disorders (WAD)

| Description of process indicators                                           | Total<br>N=810<br>n (%) / mean (SD) |
|-----------------------------------------------------------------------------|-------------------------------------|
| <b>Indicator 10: Objectives of examination</b>                              |                                     |
| Objectives musculoskeletal examination (yes)                                | 810 (100)                           |
| Objectives neurological examination (yes)                                   | 136 (16.8)                          |
| Objectives oto-neurological examination (since 2000; n=621) (yes)           | 377 (60.7)                          |
| Objectives psychological examination (since 2000; n=621) (yes)              | 577 (92.9)                          |
| <b>Indicator 11: Musculoskeletal examination</b>                            |                                     |
| Observation of posture (yes)                                                | 810 (100)                           |
| Active examination of neck function (yes)                                   | 810 (100)                           |
| Passive examination of neck function (yes)                                  | 810 (100)                           |
| Palpation of tender points (yes)                                            | 810 (100)                           |
| <b>Indicator 12: Neurological examination</b>                               |                                     |
| Sensory testing and pain (yes)                                              | 136 (16.8)                          |
| Motor testing (yes)                                                         | 130 (16.0)                          |
| Reflex testing (yes)                                                        | 130 (16.0)                          |
| Coordination testing (yes)                                                  | 91 (11.2)                           |
| <b>Indicator 13: Oto-neurological examination (since 2000; n=621)</b>       |                                     |
| Standing tests (yes)                                                        | 346 (55.7)                          |
| Walking tests (yes)                                                         | 366 (58.9)                          |
| Dizziness tests (yes)                                                       | 376 (60.5)                          |
| Nystagmus tests (yes)                                                       | 376 (60.5)                          |
| <b>Indicator 14: Psychological examination</b>                              |                                     |
| Observation of pain behavior (since 2000; n=621) (yes)                      | 577 (92.9)                          |
| Questionnaire: Pain Coping Inventory (PCI) <sup>#</sup> (since 2002; n=523) |                                     |
| - <i>Active coping</i>                                                      |                                     |

|                                                                                                                                                                                                                                                                                                                                                                                   |                                                                               |
|-----------------------------------------------------------------------------------------------------------------------------------------------------------------------------------------------------------------------------------------------------------------------------------------------------------------------------------------------------------------------------------|-------------------------------------------------------------------------------|
| <ul style="list-style-type: none"> <li>- Score 12-48 (mean; 95% CI)</li> <li>- Cutoff point: <math>\geq 24</math></li> <li>- <i>Passive coping</i></li> <li>- Score 21-84 (mean; 95% CI)</li> <li>- Cutoff point: <math>\geq 42</math></li> </ul>                                                                                                                                 | <p>27.1 (26.6-27.6)<br/>396 (75.7)</p> <p>54.2 (53.1-55.3)<br/>416 (79.5)</p> |
| <p>Questionnaire: Fear Avoidance Beliefs Questionnaire (FABQ-DV)<sup>##</sup> (since 2002; n=523)</p> <ul style="list-style-type: none"> <li>- <i>FABQ-DV-Activities</i> (n=523)</li> <li>- Score: 0-24 (mean; 95% CI)</li> <li>- Cutoff point &gt; 15)</li> <li>- <i>FABQ-DV-Work</i> (n=354)</li> <li>- Score: 0-42 (mean; 95% CI)</li> <li>- Cut off point &gt; 34)</li> </ul> | <p>16.0 (15.7-16.3)<br/>346 (66.2)</p> <p>29.3 (28.5-30.1)<br/>135 (38.1)</p> |
| <b>Indicator 15: Conclusion diagnostic process</b>                                                                                                                                                                                                                                                                                                                                |                                                                               |
| Consultation with physician about physiotherapy indication (yes)                                                                                                                                                                                                                                                                                                                  | 247 (30.5)                                                                    |
| Indication physiotherapy (yes)                                                                                                                                                                                                                                                                                                                                                    | 810 (100)                                                                     |
| <b>Indicator 16: Treatment goals per phase after accident</b>                                                                                                                                                                                                                                                                                                                     |                                                                               |
| . Phase 1 (n=19): <7 days: reducing pain; providing information and explaining the functioning consequences and underlying pain mechanisms (yes)                                                                                                                                                                                                                                  | 11 (57.9)                                                                     |
| . Phase 2 (n=140): 1-3 weeks: see Phase 1 + improving functions (yes)                                                                                                                                                                                                                                                                                                             | 82 (58.6)                                                                     |
| . Phase 3a (inestimable recovery) (n=17): 4 – 6 weeks: see Phase 2 + increasing activities and participation (yes)                                                                                                                                                                                                                                                                | 12 (70.6)                                                                     |
| . Phase 3b (delayed recovery) (n=175): 4 – 6 weeks: explaining underlying pain mechanisms, improving active coping, decreasing fear avoidance, increasing physical capacity, increasing activities and participation (yes)                                                                                                                                                        | 96 (54.9)                                                                     |
| . Phase 4a (inestimable recovery) (n=8): 7 – 12 weeks: see Phase 3a + minimizing delay in work participation (yes)                                                                                                                                                                                                                                                                | 5 (62.5)                                                                      |
| . Phase 4b (delayed recovery) (n=175): 7 – 12 weeks: see Phase 3b (n=175) (yes)                                                                                                                                                                                                                                                                                                   | 124 (70.9)                                                                    |
| . Phase 5 (chronic) (n=155): 3 – 6 months: see Phase 3b (n=155) (yes)                                                                                                                                                                                                                                                                                                             | 128 (82.6)                                                                    |
| . Phase 6 (chronic) (n=121): > 6 months: see Phase 3b (n=121) (yes)                                                                                                                                                                                                                                                                                                               | 71 (58.7)                                                                     |
| Estimation duration of treatment period                                                                                                                                                                                                                                                                                                                                           |                                                                               |
| <ul style="list-style-type: none"> <li>- inestimable</li> <li>- &lt; 1 month</li> <li>- 2-3 months</li> <li>- 4-6 months</li> <li>- &gt; 6 months</li> </ul>                                                                                                                                                                                                                      | <p>64 (7.9)</p> <p>1 (0.1)</p> <p>230 (28.4)</p> <p>516 (63.7)</p> <p>-</p>   |
| Estimation number of treatment sessions                                                                                                                                                                                                                                                                                                                                           |                                                                               |

|                                                                                                         |            |
|---------------------------------------------------------------------------------------------------------|------------|
| - inestimable                                                                                           | 77 (.9.5)  |
| - < 5 sessions                                                                                          | 1 (0.1)    |
| - 5-10 sessions                                                                                         | 1 (0.1)    |
| - 11-15 sessions                                                                                        | 252 (31.1) |
| - 16-20 sessions                                                                                        | 313 (38.6) |
| - > 20 sessions                                                                                         | 166 (20.5) |
| Treatment plan in agreement with patient (yes)                                                          | 810 (100)  |
| <b>Indicator 17: Treatment physiotherapy modalities per phase in agreement with treatment goals</b>     |            |
| . Phase 1 (n=11): Education, coaching, active exercise therapy (yes)                                    | 9 (81.8)   |
| . Phase 2 (n=82): See Phase 1 + cervical soft collar (< 1 week), massage therapy (< 2 weeks) (yes)      | 67 (81.7)  |
| . Phase 3a (n=12): See Phase 1 + physical loading exercise therapy (yes)                                | 10 (83.3)  |
| . Phase 3b (n=96): Pain education, exercise therapy based on cognitive and physical principles (yes/no) | 80 (83.3)  |
| . Phase 4a (n=5): See Phase 3a + graded activity (yes)                                                  | 3 (60.0)   |
| . Phase 4b (n=124): See Phase 3b + graded exposure (yes)                                                | 107 (86.3) |
| . Phase 5 (n=128): See Phase 4b (yes)                                                                   | 110 (85.9) |
| . Phase 6 (n=71): See Phase 5 (yes)                                                                     | 56 (78.9)  |
| <b>Indicator 18: Side effects</b>                                                                       |            |
| Treatment side or adverse effects (no)                                                                  | 810 (100)  |

Legend:

# Pain Coping Inventory (PCI): 33-items questionnaire measuring active coping (PCI-Active: 12 items [score: 12-48];  $\geq 24$  active coping) and passive coping (PCI-P: 21 items [score: 21-84];  $\geq 42$  passive coping). Items are scored on a 4-point Likert scale ranging from 1 (hardly ever) to 4 (very often);

### Fear Avoidance Beliefs Questionnaire- Dutch Version (FABQ-DV): 16-items questionnaire measuring fear avoidance beliefs about physical activities (FABQ-DV-Activities: 4 items [range score: 0-24];  $> 15$  at risk for pain avoiding behavior); work-related activities (FABQ-DV-Work: 7 items [range score: 0-42];  $> 34$  at risk for no return to work). Items are scored on a 7-point Likert scale ranging from 0 (completely disagree) to 6 (completely agree).



**Supplementary file 4.**

**Variables per outcome indicator in patients with Whiplash-Associated Disorders (WAD)**

| Description of outcome indicators                                       | Total<br>N=810<br>n (%) / mean (95% CI) |
|-------------------------------------------------------------------------|-----------------------------------------|
| <b>Indicator 19: Intermediate evaluation</b>                            |                                         |
| Frequency                                                               |                                         |
| - Weekly                                                                | 790 (97.5)                              |
| - Monthly                                                               | 20 (2.5)                                |
| Type of evaluation                                                      |                                         |
| - By asking                                                             | 625 (77.2)                              |
| - By asking + treatment goals                                           | 185 (22.8)                              |
| If necessary, adjustment of treatment goals and modalities (yes)        | 185 (22.8)                              |
| Contact physician if insufficient treatment result (yes)                | 247 (30.5)                              |
| <b>Indicator 20: Subjective final evaluation</b>                        |                                         |
| Subjective evaluation                                                   |                                         |
| - By asking                                                             | 315 (38.9)                              |
| - By asking + treatment goals                                           | 495 (61.1)                              |
| Returned to work participation                                          |                                         |
| - Not employed                                                          | 228 (28.1)                              |
| - Employed with adjustments                                             | 313 (38.6)                              |
| - Employed without adjustments                                          | 184 (22.7)                              |
| - Retired                                                               | 85 (10.5)                               |
| <b>Indicator 21: Objective final evaluation</b>                         |                                         |
| Pain intensity - Visual Analogue Scale Pain (VAS-P) (since 2002; n=523) |                                         |
| - Score 0-100 (mean; 95% CI)                                            | 29.6 (28.4-30.7)                        |
| - ≤ 30: functionally recovered                                          | 310 (59.3)                              |
| Functioning - Neck Disability Index (NDI) (since 2002; n=523)           |                                         |
| - Score 0-50 (mean; 95% CI)                                             | 15.9 (15.1-16.6)                        |
| - ≤ 14: functionally recovered                                          | 191 (36.5)                              |

| Indicator 22: Global Perceived Effect                                |            |
|----------------------------------------------------------------------|------------|
| Evaluation by Global Perceived Effect (GPE: 0-6) (since 2002; n=523) |            |
| - 1 + 2: Complete / much recovered and improved                      | 241 (46.1) |
| - 3 + 4 + 5: Slightly improved / worse                               | 282 (53.9) |
| Indicator 23: Treatment duration and number of sessions              |            |
| Duration of treatment period                                         |            |
| - < 1 month                                                          | -          |
| - 2-3 months                                                         | 280 (34.6) |
| - 4-6 months                                                         | 501 (61.9) |
| - > 6 months                                                         | 29 (3.6)   |
| Number of treatment sessions                                         |            |
| - < 5                                                                | 2 (0.2)    |
| - 5-10                                                               | 10 (1.2)   |
| - 11-15                                                              | 329 (40.6) |
| - 16-20                                                              | 405 (50.0) |
| - > 20                                                               | 64 (7.9)   |
| Indicator 24: Discharge                                              |            |
| Reason for discharge (since 2002; n=523)                             |            |
| - Maximal result                                                     | 34 (4.5)   |
| - Optimal result                                                     | 207 (39.6) |
| - Minimal result                                                     | 199 (38.0) |
| - No result                                                          | 83 (15.9)  |
| Written report (yes)                                                 | 810 (100)  |
| Indicator 25: Aftercare                                              |            |
| Arrangement of aftercare (since 2003; n=457) (yes)                   | 151 (33.0) |
